# Supplementary material
Source: publisher site journal article supplement (https://www.dovepress.com/article/519566)
Supplement: Supplementary file 1 [file 519566%20Supplementary%20Material.pdf]

**Table S1. Primers for RT-qPCR.**

| Symbol (ID)    | Type    | Sequence (5'-3')                  | Product size |
|----------------|---------|-----------------------------------|--------------|
| Actb (11461)   | Forward | B662302 (Sangon, Shanghai, China) | 174bp        |
|                | Reverse | B662302 (Sangon, Shanghai, China) |              |
| Mif (17319)    | Forward | GCATCGGCAAGATCGGTGGTG             | 130bp        |
|                | Reverse | ACGTTGGCAGCGTTCATGTCTG            |              |
| Mdk (17242)    | Forward | GCTTCTTCCTTCTCGCCCTTCTTG          | 84bp         |
|                | Reverse | CGCTGCCCTTCTTCACCTTCTC            |              |
| Lgals9 (16859) | Forward | CTACTCCTGGAATCCCTCCTGTGG          | 137bp        |
|                | Reverse | CTACTCCTGGAATCCCTCCTGTGG          |              |

**Table S2A. The concordance between clinical and histological grouping**

|               | Clinical inactive | Clinical active |
|---------------|-------------------|-----------------|
| Histological: |                   |                 |
| Inactive      | 101               | 69              |
| Active        | 13                | 72              |
| Accuracy      | 0.678             |                 |
| Cohen's Kappa | 0.379             |                 |
| Binomial test | P<0.001           |                 |

**Table S2B. The concordance between clinical and endoscopic grouping**

|               | Clinical inactive | Clinical active |
|---------------|-------------------|-----------------|
| Endoscopic:   |                   |                 |
| Inactive      | 177               | 36              |
| Active        | 155               | 225             |
| Accuracy      | 0.678             |                 |
| Cohen's Kappa | 0.377             |                 |
| Binomial test | P<0.001           |                 |

**Table S2C. The concordance between histological and endoscopic grouping**

|               | Histological inactive | Histological active |
|---------------|-----------------------|---------------------|
| Endoscopic:   |                       |                     |
| Inactive      | 56                    | 8                   |
| Active        | 114                   | 77                  |
| Accuracy      | 0.522                 |                     |
| Cohen's Kappa | 0.179                 |                     |
| Binomial test | P = 1.000             |                     |

**Table S2D. The concordance between clinical and CDRG-based grouping**

|               | Clinical inactive | Clinical active |
|---------------|-------------------|-----------------|
| CDRG-based:   |                   |                 |
| Inactive      | 273               | 102             |
| Active        | 60                | 161             |
| Accuracy      | 0.728             |                 |
| Cohen's Kappa | 0.439             |                 |
| Binomial test | P<0.001           |                 |

**Table S2E. The concordance between histological and CDRG-based grouping**

|               | Histological inactive | Histological active |
|---------------|-----------------------|---------------------|
| CDRG-based:   |                       |                     |
| Inactive      | 128                   | 18                  |
| Active        | 42                    | 67                  |
| Accuracy      | 0.765                 |                     |
| Cohen's Kappa | 0.506                 |                     |
| Binomial test | P<0.001               |                     |

**Table S2F. The concordance between endoscopic and CDRG-based grouping**

|               | Endoscopic inactive | Endoscopic active |
|---------------|---------------------|-------------------|
| CDRG-based:   |                     |                   |
| Inactive      | 169                 | 204               |
| Active        | 44                  | 176               |
| Accuracy      | 0.581               |                   |
| Cohen's Kappa | 0.220               |                   |
| Binomial test | P = 0.999           |                   |

**Table S3A. The concordance between the inconsistencies of histological grouping to clinical grouping and CDRG-based grouping to clinical grouping**

|               | Histological consistent | Histological inconsistent |
|---------------|-------------------------|---------------------------|
| CDRG-based:   |                         |                           |
| Consistent    | 144                     | 31                        |
| Inconsistent  | 29                      | 51                        |
| Accuracy      | 0.765                   |                           |
| Cohen's Kappa | 0.457                   |                           |
| Binomial test | P = 0.002               |                           |

**Table S3B. The concordance between the inconsistencies of endoscopic grouping to clinical grouping and CDRG-based grouping to clinical grouping**

|                        | Endoscopic consistent | Endoscopic inconsistent |
|------------------------|-----------------------|-------------------------|
| CDRG-based clustering: |                       |                         |
| Consistent             | 293                   | 139                     |
| Inconsistent           | 109                   | 52                      |
| Accuracy               | 0.582                 |                         |
| Cohen's Kappa          | 0.001                 |                         |
| Binomial test          | P = 1.000             |                         |

**Table S3C. The concordance between the inconsistencies of histological grouping to clinical grouping and endoscopic grouping to clinical grouping**

|               | Histological consistent | Histological inconsistent |
|---------------|-------------------------|---------------------------|
| Endoscopic:   |                         |                           |
| Consistent    | 112                     | 61                        |
| Inconsistent  | 61                      | 21                        |
| Accuracy      | 0.522                   |                           |
| Cohen's Kappa | -0.097                  |                           |
| Binomial test | P = 1.000               |                           |

**Table S3D. The concordance between the clinical and endoscopic grouping in CDRG-consistent samples**

|               | Clinical inactive | Clinical active |
|---------------|-------------------|-----------------|
| Endoscopic:   |                   |                 |
| Inactive      | 149               | 16              |
| Active        | 123               | 144             |
| Accuracy      | 0.678             |                 |
| Cohen's Kappa | 0.394             |                 |
| Binomial test | P = 0.020         |                 |

**Table S3E. The concordance between the histological and endoscopic grouping in CDRG-consistent samples**

|               | Histological inactive | Histological active |
|---------------|-----------------------|---------------------|
| Endoscopic:   |                       |                     |
| Inactive      | 41                    | 6                   |
| Active        | 68                    | 60                  |
| Accuracy      | 0.577                 |                     |
| Cohen's Kappa | 0.241                 |                     |
| Binomial test | P = 0.907             |                     |

**Table S3F. The concordance between the clinical and endoscopic grouping in CDRG-inconsistent samples**

|               | Clinical inactive | Clinical active |
|---------------|-------------------|-----------------|
| Endoscopic:   |                   |                 |
| Inactive      | 28                | 20              |
| Active        | 32                | 81              |
| Accuracy      | 0.677             |                 |
| Cohen's Kappa | 0.280             |                 |
| Binomial test | P = 0.110         |                 |

**Table S3G. The concordance between the histological and endoscopic grouping in**

**CDRG-inconsistent samples**

---

|               | Histological inactive | Histological active |
|---------------|-----------------------|---------------------|
| Endoscopic:   |                       |                     |
| Inactive      | 15                    | 2                   |
| Active        | 46                    | 17                  |
| Accuracy      | 0.400                 |                     |
| Cohen's Kappa | 0.078                 |                     |
| Binomial test | P = 1.000             |                     |

---

**Table S4A. The concordance between clinical and DEG-based grouping**

|               | Clinical inactive | Clinical active |
|---------------|-------------------|-----------------|
| DEG-based:    |                   |                 |
| Inactive      | 312               | 129             |
| Active        | 15                | 114             |
| Accuracy      | 0.747             |                 |
| Cohen's Kappa | 0.450             |                 |
| Binomial test | P<0.001           |                 |

**Table S4B. The concordance between histological and DEG-based grouping**

|               | Histological inactive | Histological active |
|---------------|-----------------------|---------------------|
| DEG-based:    |                       |                     |
| Inactive      | 140                   | 25                  |
| Active        | 19                    | 56                  |
| Accuracy      | 0.817                 |                     |
| Cohen's Kappa | 0.582                 |                     |
| Binomial test | P<0.001               |                     |

**Table S4C. The concordance between endoscopic and DEG-based grouping**

|               | Endoscopic inactive | Endoscopic active |
|---------------|---------------------|-------------------|
| DEG-based:    |                     |                   |
| Inactive      | 196                 | 243               |
| Active        | 13                  | 115               |
| Accuracy      | 0.549               |                   |
| Cohen's Kappa | 0.211               |                   |
| Binomial test | P = 1.000           |                   |

**Table S4D. The concordance between DEG-based and CDRG-based grouping**

|             | DEG-based inactive | DEG-based active |
|-------------|--------------------|------------------|
| CDRG-based: |                    |                  |
| Inactive    | 354                | 3                |
| Active      | 87                 | 126              |

|               |           |
|---------------|-----------|
| Accuracy      | 0.842     |
| Cohen's Kappa | 0.634     |
| Binomial test | P < 0.001 |

**Table S4E. The concordance between the inconsistencies of DEG-based grouping to clinical grouping and CDRG-based grouping to clinical grouping**

|               | DEG-based consistent | DEG-based inconsistent |
|---------------|----------------------|------------------------|
| CDRG-based:   |                      |                        |
| Consistent    | 378                  | 42                     |
| Inconsistent  | 48                   | 102                    |
| Accuracy      | 0.842                |                        |
| Cohen's Kappa | 0.588                |                        |
| Binomial test | P < 0.001            |                        |

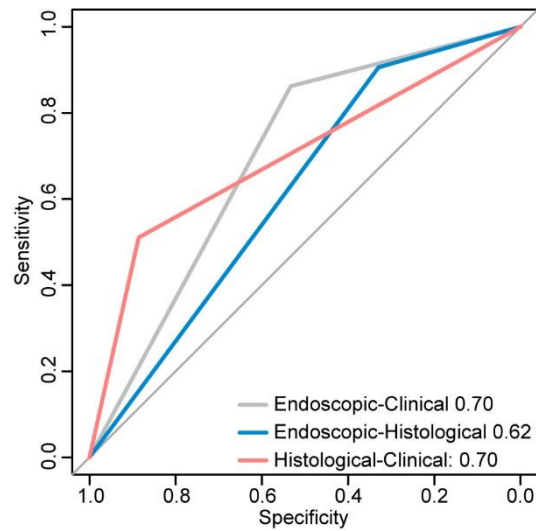

**Figure S1. Predictive values of histological grouping to clinical grouping and endoscopic grouping to clinical and histological grouping.**

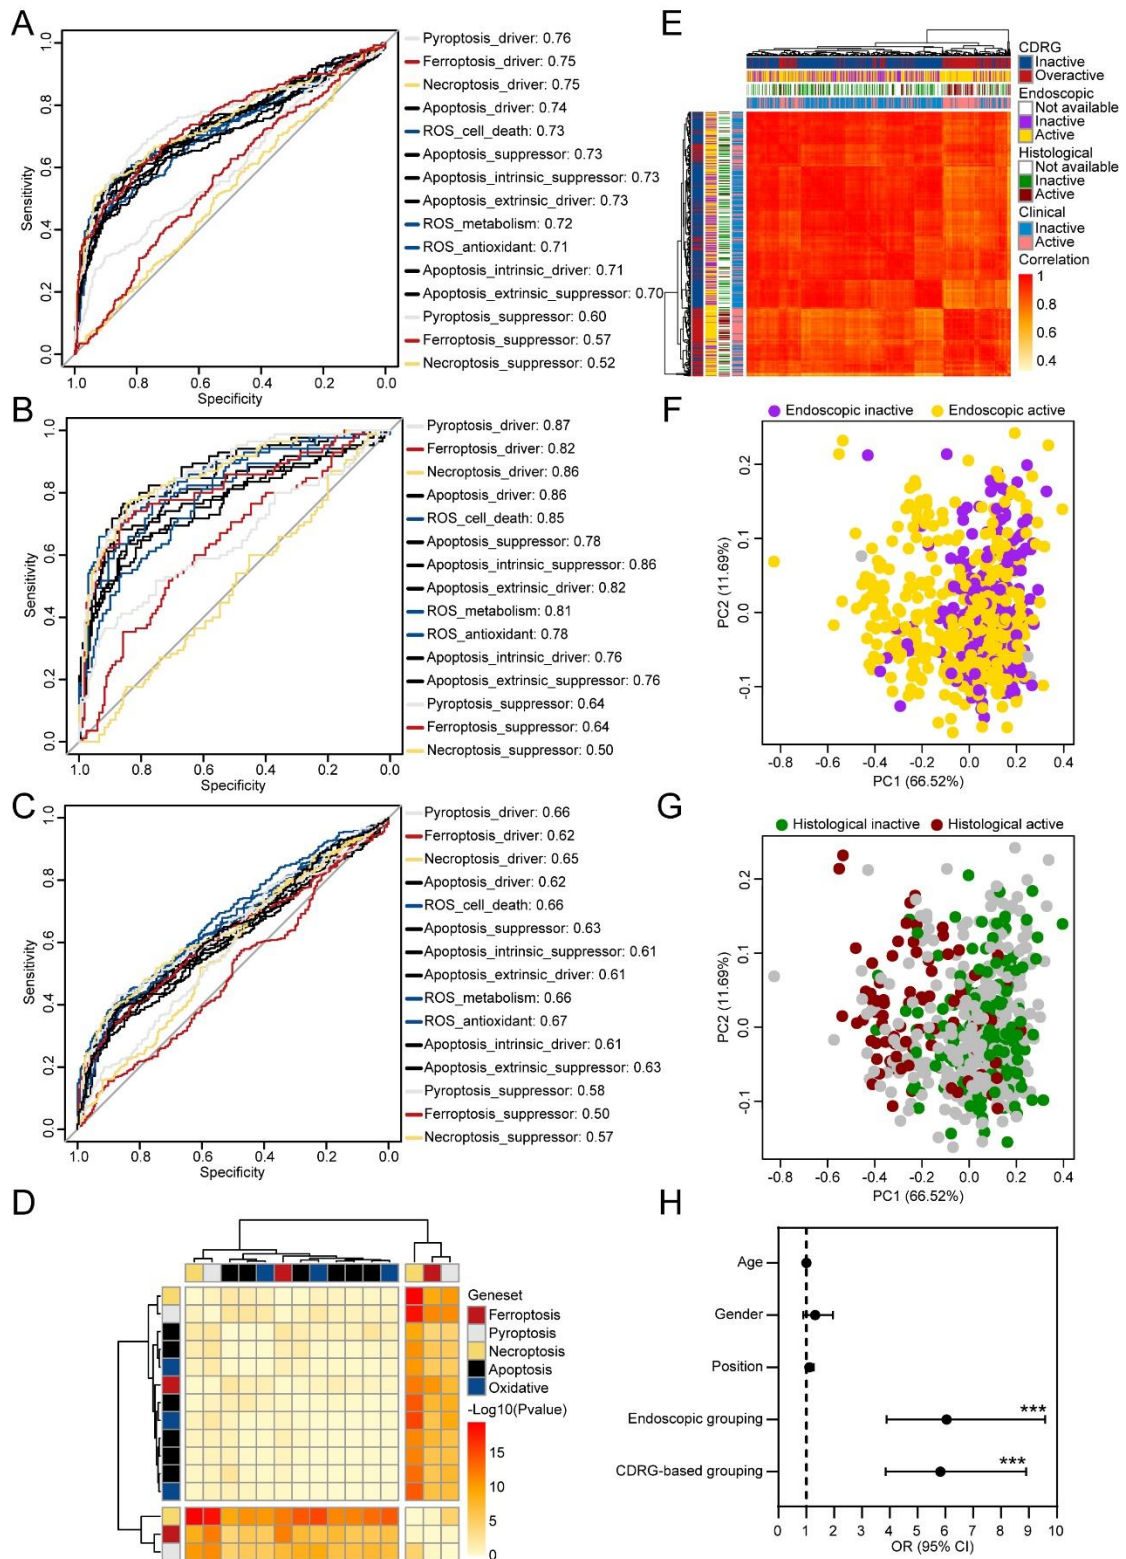

**Figure S2. Predictive values CDRGs and CDRG-based grouping.** (A-C) Predictive values of 15 CDRGs to clinical (A), histological (B), and endoscopic (C) grouping. (D) Unsupervised hierarchical clustering on the comparisons of AUCs in the prediction of 15 CDRGs to clinical grouping, with  $-\log_{10}$  transformed P value, (E) Unsupervised hierarchical clustering on the

sample-sample correlations based on 15 CDRGs. (F-G) Distribution of samples in CDRG-based PCA grouped by endoscopic (F) or histological (G) grouping. (H) Odds ratio of age, gender, biopsy position, endoscopic grouping, and CDRG-based clustering in multivariable logistic regression analysis were showed in forest plot.

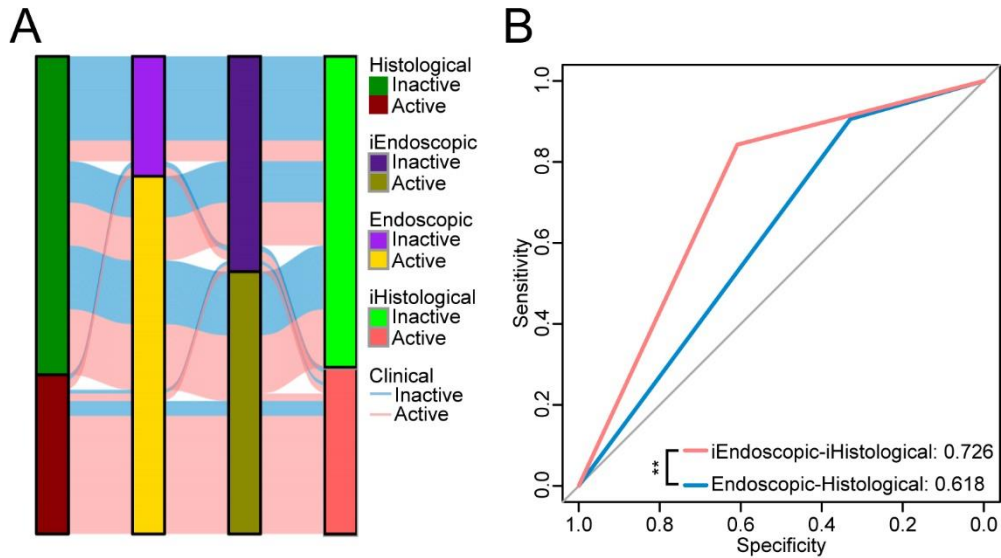

**Figure S3. Improved concordance between histological and endoscopic grouping after integration with CDRG-based grouping.** (A) Concordance between histological grouping, iMES grouping, endoscopic grouping and iNancy grouping. (B) Predictive values of iMES grouping on iNancy grouping, compared with endoscopic grouping to histological grouping.

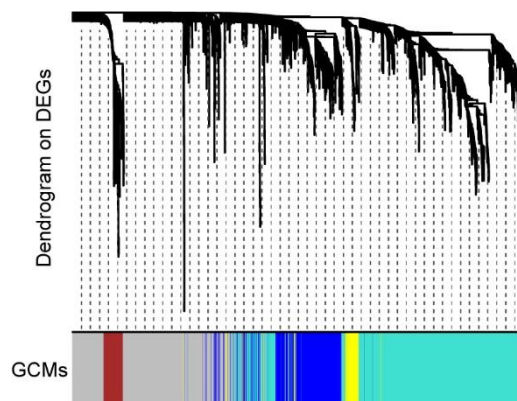

**Figure S4. Dendrogram of differentially expressed genes with corresponding gene co-expression modules in weighted gene co-expression network analysis.**

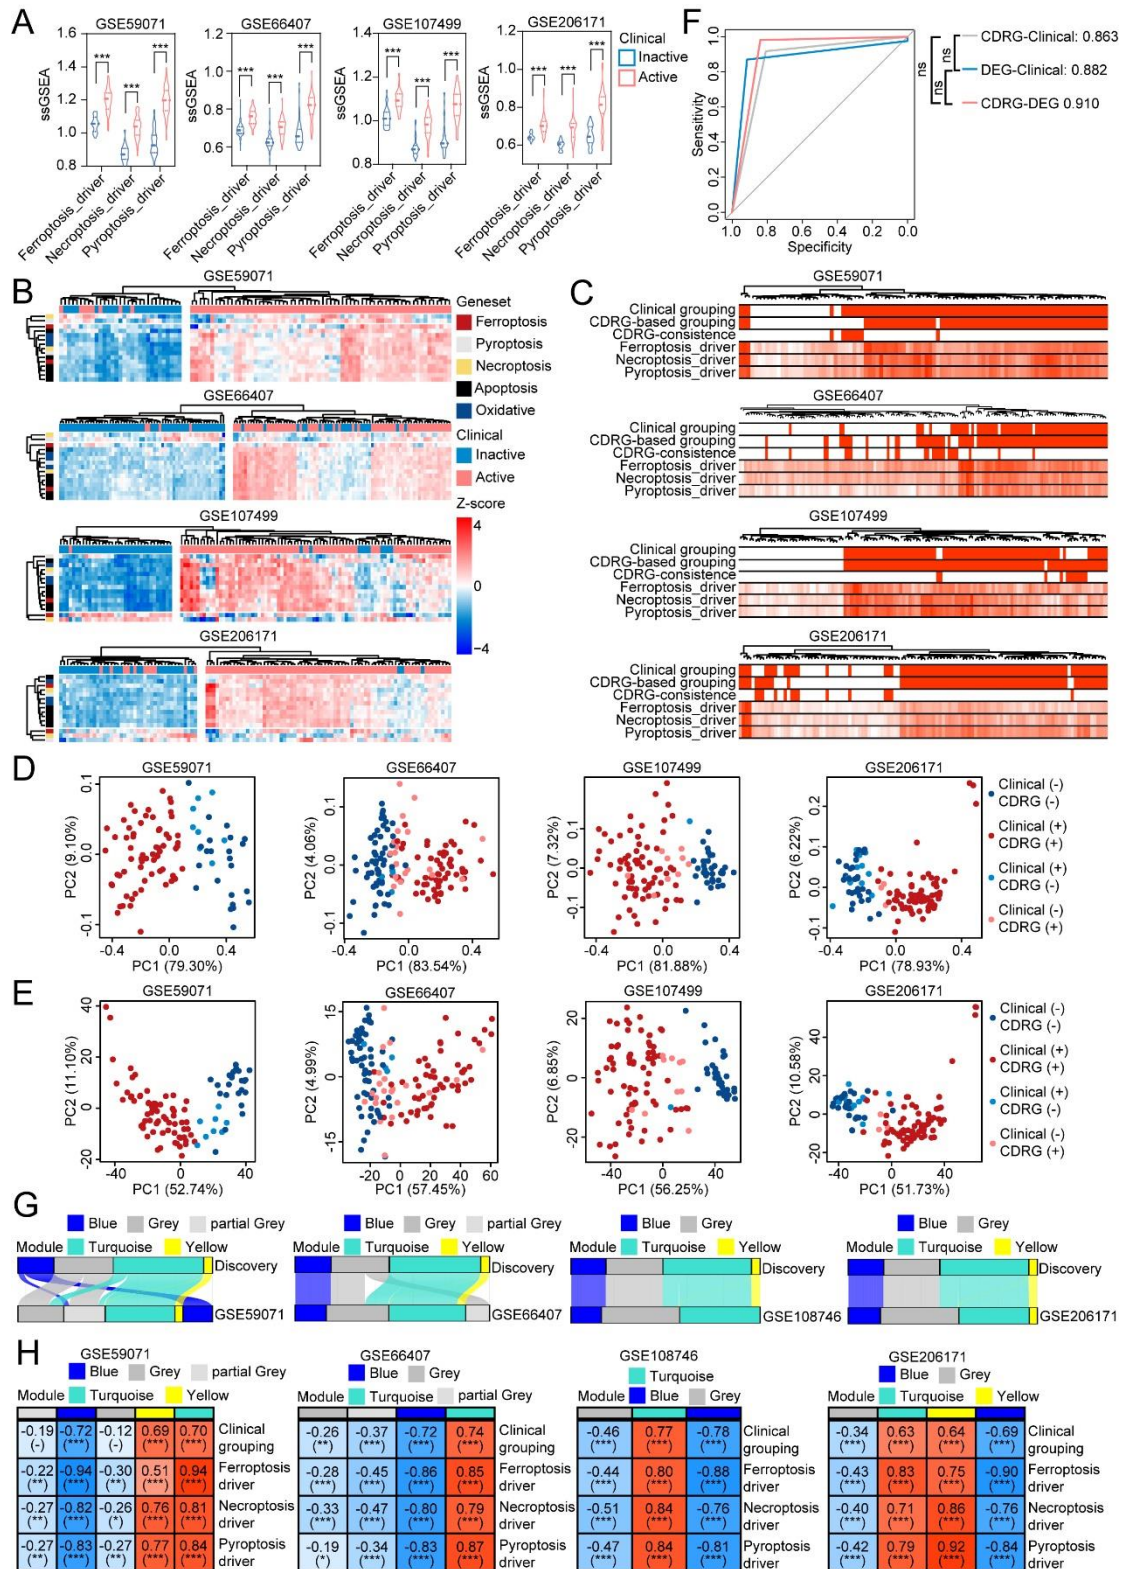

**Figure S5. Intrinsic association between cell death related genesets and altered gene-expression patterns was reproduced in multiple validation cohorts of UC with large sample size.** (A) Median, upper/lower quartiles, and upper/lower limits of the CDRGs' activities created using ssGSEA in 4 validation cohorts. (B) Unsupervised hierarchical clustering based on CDRGs in 4 validation cohorts. (C) Unsupervised hierarchical clustering based on DEGs of 4 confident GCMs in 4 validation cohorts, with annotation of clinic, CDRG-based

clustering, CDRG-inconsistence to clinic, and 3 representative CDRGs. (D) Distribution of samples grouped by clinic and CDRG-based clustering in PCA based on CDRGs in 4 validation cohorts. (E) Distribution of samples grouped by clinic and CDRG-based clustering in PCA based on DEGs with genes of brown GCM excluded. (F) Predictive value of CDRG-based clustering and DEG-based clustering to clinic, and of CDRG-based clustering to DEG-based clustering in samples of 4 validation cohorts. (G) Concordance between 4 confident GCMs of discovery cohort and GCMs detected in 4 validation cohorts. (H) Correlations between the GCMs detected in 4 validation cohorts and clinic and 3 representative CDRGs. ns,  $P > 0.05$ ; \*,  $P < 0.05$ ; \*\*,  $P < 0.01$ ; \*\*\*,  $P < 0.001$ .

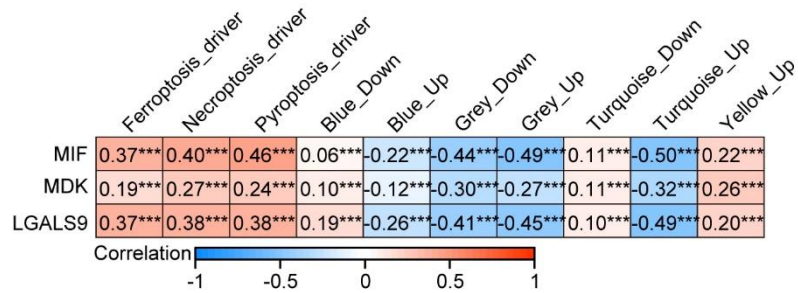

**Figure S6. MIF, MDK, and LGALS9 correlated with 3 representative CDRGs and split GCMs in epithelial cells from scRNA-seq.**
